# Supplementary material for: Different Associations Between the IREB2 Variants and Chronic Obstructive Pulmonary Disease Susceptibility
Source: Front Genet. 2020 Nov 16;11:598053. doi: 10.3389/fgene.2020.598053 (PMC7701307; doi:10.3389/fgene.2020.598053)
Supplement: Supplementary file 2 [file Data_Sheet_2.XLSX]

## Sheet: TableS1
Table S1.Genetic models OR and 95%CI for rs2568494 polymorphism at IREB2 gene in COPD patients and controls.
The allele model:
Subgroups	Study	year	Origin	OR	[95% CI]
AvsG	Guo et al.	2011	China	0.97	0.699-1.345
AvsG	Chappell et al.	2011	Caucasian	1.304	1.143-1.487
AvsG	Zhou et al.	2012	China	0.969	0.760-1.237
AvsG	Arja et al.	2014	Indian	0.843	0.599-1.186
AvsG	Suchanek et al.	2015	Poland	1.042	0.795-1.366
The additive model:
Subgroups	Study	year	Origin	OR	[95% CI]
AAvsGG	Guo et al.	2011	China	1.332	0.442-4.015
AAvsGG	Chappell et al.	2011	Caucasian	1.762	1.324-2.346
AAvsGG	Zhou et al.	2012	China	0.603	0.230-1.584
AAvsGG	Arja et al.	2014	Indian	0.878	0.618-1.248
AAvsGG	Suchanek et al.	2015	Poland	1.084	0.605-1.942
The recessive model:
Subgroups	Study	year	Origin	OR	[95% CI]
AAvsGG+GA	Guo et al.	2011	China	1.361	0.452-4.092
AAvsGG+GA	Chappell et al.	2011	Caucasian	1.553	1.192-2.025
AAvsGG+GA	Zhou et al.	2012	China	0.598	0.228-1.566
AAvsGG+GA	Arja et al.	2014	Indian	0.336	0.129-0.876
AAvsGG+GA	Suchanek et al.	2015	Poland	1.069	0.618-1.851
The dominant model:
Subgroups	Study	year	Origin	OR	[95% CI]
AA+GAvsGG	Guo et al.	2011	China	0.932	0.648-1.340
AA+GAvsGG	Chappell et al.	2011	Caucasian	1.355	1.126-1.631
AA+GAvsGG	Zhou et al.	2012	China	1.005	0.768-1.317
AA+GAvsGG	Arja et al.	2014	Indian	1.04	0.679-1.594
AA+GAvsGG	Suchanek et al.	2015	Poland	1.039	0.720-1.500

## Sheet: TableS2
Table S2.Genetic models OR and 95%CI for rs2656069 polymorphism at IREB2 gene in COPD patients and controls.
The allele model:
Subgroups	Study	year	Origin	OR	[95% CI]
GvsA	Chappell et al.	2011	Caucasian	0.743	0.631-0.876
GvsA	Zhou et al.	2012	China	1.034	0.858-1.245
GvsA	Arja et al.	2014	Indian	0.793	0.586-1.072
GvsA	Suchanek et al.	2015	Poland	0.678	0.505-0.911
The additive model:
Subgroups	Study	year	Origin	OR	[95% CI]
GGvsAA	Chappell et al.	2011	Caucasian	0.381	0.221-0.655
GGvsAA	Zhou et al.	2012	China	0.904	0.560-1.459
GGvsAA	Arja et al.	2014	Indian	0.751	0.543-1.039
GGvsAA	Suchanek et al.	2015	Poland	0.527	0.216-1.288
The recessive model:
Subgroups	Study	year	Origin	OR	[95% CI]
GGvsAA+AG	Chappell et al.	2011	Caucasian	0.406	0.237-0.695
GGvsAA+AG	Zhou et al.	2012	China	0.817	0.512-1.303
GGvsAA+AG	Arja et al.	2014	Indian	0.557	0.290-1.070
GGvsAA+AG	Suchanek et al.	2015	Poland	0.552	0.228-1.335
The dominant model:
Subgroups	Study	year	Origin	OR	[95% CI]
GG+AGvsAA	Chappell et al.	2011	Caucasian	0.759	0.627-0.919
GG+AGvsAA	Zhou et al.	2012	China	1.203	0.954-1.518
GG+AGvsAA	Arja et al.	2014	Indian	0.771	0.499-1.191
GG+AGvsAA	Suchanek et al.	2015	Poland	0.817	0.561-1.191

## Sheet: TableS3
Table S3.Genetic models OR and 95%CI for rs10851906 polymorphism at IREB2 gene in COPD patients and controls.
The allele model:
Subgroups	Study	year	Origin	OR	[95% CI]
GvsA	Chappell et al.	2011	Caucasian	0.789	0.583- 1.068
GvsA	Zhou et al.	2012	China	1.043	0.867-1.256
GvsA	Arja et al.	2014	Indian	0.789	0.583-1.068
GvsA	Suchanek et al.	2015	Poland	0.796	0.580-1.093
The additive model:
Subgroups	Study	year	Origin	OR	[95% CI]
GGvsAA	Chappell et al.	2011	Caucasian	0.765	0.556-1.052
GGvsAA	Zhou et al.	2012	China	0.896	0.556-1.445
GGvsAA	Arja et al.	2014	Indian	0.765	0.556-1.052
GGvsAA	Suchanek et al.	2015	Poland	0.615	0.266-1.425
The recessive model:
Subgroups	Study	year	Origin	OR	[95% CI]
GGvsAA+AG	Chappell et al.	2011	Caucasian	0.825	0.536-1.269
GGvsAA+AG	Zhou et al.	2012	China	0.8	0.502-1.274
GGvsAA+AG	Arja et al.	2014	Indian	0.512	0.270-0.972
GGvsAA+AG	Suchanek et al.	2015	Poland	0.649	0.283-1.487
The dominant model:
Subgroups	Study	year	Origin	OR	[95% CI]
GG+AGvsAA	Chappell et al.	2011	Caucasian	0.512	0.270-0.972
GG+AGvsAA	Zhou et al.	2012	China	1.229	0.974-1.551
GG+AGvsAA	Arja et al.	2014	Indian	0.825	0.536-1.269
GG+AGvsAA	Suchanek et al.	2015	Poland	0.817	0.561-1.191

## Sheet: TableS4
Table S4.Genetic models OR and 95%CI for rs12593229 polymorphism at IREB2 gene in COPD patients and controls.
The allele model:
Subgroups	Study	year	Origin	OR	[95% CI]
TvsG	Chappell et al.	2011	China	0.736	0.644-0.841
TvsG	Zhou et al.	2012	Caucasian	1.027	0.871-1.210
TvsG	Arja et al.	2014	Indian	0.965	0.721- 1.293
The additive model:
Subgroups	Study	year	Origin	OR	[95% CI]
TTvsGG	Chappell et al.	2011	China	0.561	0.419-0.750
TTvsGG	Zhou et al.	2012	Caucasian	1.19	0.856-1.654
TTvsGG	Arja et al.	2014	Indian	0.948	0.701-1.282
The recessive model:
Subgroups	Study	year	Origin	OR	[95% CI]
TTvsGG+GT	Chappell et al.	2011	China	0.658	0.501-0.863
TTvsGG+GT	Zhou et al.	2012	Caucasian	1.128	0.871-1.461
TTvsGG+GT	Arja et al.	2014	Indian	0.938	0.568-1.549
The dominant model:
Subgroups	Study	year	Origin	OR	[95% CI]
TT+GTvsGG	Chappell et al.	2011	China	0.697	0.580-0.838
TT+GTvsGG	Zhou et al.	2012	Caucasian	1.119	0.846-1.478
TT+GTvsGG	Arja et al.	2014	Indian	0.927	0.574-1.496

## Sheet: TableS5
Table S5.Genetic models OR and 95%CI for rs13180 polymorphism at IREB2 gene in COPD patients and controls.
The allele model:
Subgroups	Study	Year	Origin	OR	[95% CI]
Tvs C	Hardin et al.	2012	Poland	0.69	0.530-0.880
Tvs C	Cho et al.	2012	Norway	0.79	0.670-0.940
Tvs C	Zhou et al.	2012	China	0.968	0.822-1.141
Tvs C	Ding et al.	2014	China	0.928	0.730-1.179
Tvs C	Suchanek et al.	2015	Poland	1.048	0.804-1.366
Tvs C	Korytina et al.	2016	Russia	1.493	1.245-1.790
Tvs C	Nedeljkovic et al.	2018	Netherlands	0.786628	0.630-0.982
The additive model:
Subgroups	Study	Year	Origin	OR	[95% CI]
TTvs CC	Zhou et al.	2012	China	0.823	0.592-1.145
TTvs CC	Ding et al.	2014	China	0.941	0.578-1.533
TTvs CC	Suchanek et al.	2015	Poland	1.181	0.680-2.050
TTvs CC	Korytina et al.	2016	Russia	2.036	1.398-2.964
The recessive model:
Subgroups	Study	Year	Origin	OR	[95% CI]
TTvs CC+ CT	Zhou et al.	2012	China	0.876	0.661-1.160
TTvs CC+ CT	Ding et al.	2014	China	0.942	0.632-1.404
TTvs CC+ CT	Suchanek et al.	2015	Poland	1.147	0.790-1.664
TTvs CC+ CT	Korytina et al.	2016	Russia	1.662	1.293-2.135
The dominant model:
Subgroups	Study	Year	Origin	OR	[95% CI]
TT + CT vs CC	Zhou et al.	2012	China	0.88	0.681-1.138
TT + CT vs CC	Ding et al.	2014	China	0.979	0.657-1.459
TT + CT vs CC	Suchanek et al.	2015	Poland	1.102	0.662-1.834
TT + CT vs CC	Korytina et al.	2016	Russia	1.631	1.150-2.315
